# Supplementary material
Source: Copernicus journal article supplement (doi:10.5194/egusphere-2024-2422)
Supplement: Supplementary file [file egusphere-2024-2422-AC2-supplement.pdf]

# 1 Response to Reviewers: "Huge Ensembles Part II: Properties of a 2 Huge Ensemble Designed with Spherical Fourier Neural Operators"

3  
4 February 17, 2025

## 5 Overview

6 We sincerely thank the reviewers for their constructive comments and review of our paper. These comments  
7 will substantially improve our manuscript. We have included responses to the reviewers' comments below,  
8 with the reviewer comments in black text and our response in green text.

9 In this document, we will detail our planned revisions. Some of the reviewer comments require re-  
10 analyzing our ensemble simulation with additional variables, such as 10m north-south wind, 10m east-  
11 west wind, heat indices, and others. We request a short period of time due to the computational and data  
12 requirements of these comments. The ensemble simulations use  $O(1)$  TB per variable for a 58-member  
13 ensemble, and  $O(100)$  TB per variable for the huge ensemble. Upon completion of the analysis that the  
14 reviewers suggest, we will submit a revised version of the manuscript in mid-March 2025.

15 For public reference, this is the second of a two-part manuscript on huge ensembles. We refer to part I  
16 as HENS Part I [Mahesh et al., 2024a], and we refer to part II as HENS Part II [Mahesh et al., 2024b].

## 17 Comments from Reviewer #1

18 Part 1 and 2 are both interesting papers that document the development and use of a machine learned ensem-  
19 ble weather forecast model with an enormous number of ensemble members. The papers fit well into GMD,  
20 but I think that they should be revised following the comments below. The paper presents very interesting  
21 and useful information about how the huge ensemble is generated and how much effort it requires to run  
22 such a model.

23 Thank you for this overview of our paper.

24 However, the evaluation of the usefulness of a huge ensemble is rather weak as it is presenting the  
25 "easy" task of Gaussian predictions but avoids diagnostics that evaluate the "hard" tasks for a huge ensemble  
26 that could actually show the real usefulness. I am left a bit puzzled after reading the paper how the huge  
27 ensembles could actually become useful. I doubt that our current 50-member ensembles would greatly  
28 benefit from more ensemble members if we assume that we predict Gaussian distributions.

29 Thank you. We wish to clarify two things:

- 30 1. We do not assume that the ensemble distribution is Gaussian. This is an emergent property of the  
31 ensemble quantity we study in Figure 2 and Figure 4: the global land mean for each variable. The  
32 Gaussianity could arise from taking a large spatial mean over all land grid cells over the globe. We  
33 state,

34 *For all variables, the HENS gain closely follows the theoretical Gaussian gain. This result is not com-*  
35 *pletely surprising: averaging over a large number of grid cells implies that a Central Limit Theorem*  
36 *should apply (even though the grid box values are neither independent nor identically distributed),*  
37 *wherein the global land averages behave similarly to a Gaussian random variable. In Section 3.1,*  
38 *we state why we choose to study this particular quantity:*

39 *At a given time, there will likely be extreme conditions occurring somewhere on Earth, simply due to*  
40 *the spatial variation of weather. In our calculation of information gain, we do not consider the spatial*  
41 *distribution of extremes, which varies significantly within each ensemble member. Instead, we wish to*  
42 *assess the distribution across ensemble members. Therefore, we calculate the information gain on the*  
43 *global land mean values of each ensemble member. This allows us to assess the ensemble members in*  
44 *aggregate and how far each ensemble member is from the ensemble mean.*

- 45 2. For all other analysis, other than Figures 2 and Figures 4, we analyze statistics at the grid cell level.  
46 In particular, Figure 3 is a version of Figure 2 without making the Gaussian assumption or taking a  
47 land-mean. We make no assumption about the distribution of the quantity of interest, neither in the  
48 ensemble forecast nor in the verification ERA5 dataset.

49 We have EMOS to improve predictions for 50-member ensembles, so no need for huge ensembles. How  
50 does the information gain of 4 compare against the IFS ensemble with EMOS?

51 For our revised manuscript, we are working to obtain enough of an IFS model climatology to calculate  
52 this quantity. However, for SFNO-BVMC, we note that gain is convincingly a function of ensemble size,  
53 both with and without the Gaussian distribution at play, (Figure 2 and Figure 3).

54 It seems to be of less relevance to have a prediction of the uncertainty range of the probability for an  
55 extreme prediction.

56 We respectfully wish to highlight this as an important advantage of HENS. Taking our example heatwave  
57 in Shreveport, Louisiana, USA, a 58-member ensemble predicted that a heatwave could occur with 18%  
58 probability, but the 95th percentile confidence interval of this event was large, from 8.7% to 28% (Figure 9  
59 and section 4.2). In the extreme event forecast, there is an uncertainty introduced by limited sampling: in the  
60 space of all possible ensemble members, which 58 members were selected? HENS reduces this sampling  
61 uncertainty significantly. For Shreveport, the confidence interval became narrower, ranging from 17.1% to  
62 18.9%; see Figure 10 for the results of this analysis across the entire period.

63 HENS and the 58-member ensemble are almost equally reliable (Figure C1), but HENS has narrower  
64 confidence intervals. In this way, HENS is a more useful forecast. We propose that reducing the error  
65 bounds on extreme event forecasts is a highly valuable benefit of huge ensembles.

66 I also do not think that an ensemble range that predicts temperatures between 295 and 320K will be  
67 of any assistance for a decision maker (as seen in Figure 5). To have a couple of members from a 1000-  
68 member ensemble close to the truth will not trigger any decisions for a forecast. The same is true for the  
69 outcome-weighted CRPS discussion. If we assume that the distributions of variables that are of interest are  
70 non-Gaussian, in particular for extremes, the huge ensembles may be extremely useful to sample the tails of  
71 the distribution.

72 We agree: if a couple of members from a huge ensemble are close to the truth, that will not trigger decisions  
73 for a forecast because we do not know which members those will be ahead of time. For an operational

74 decision-maker, the benefit of a huge ensemble is that it reduces the error bounds on the probability of  
75 extreme (see point above), and that it has a reduced outcome-weighted CRPS (owCRPS). owCRPS directly  
76 measures how well the forecast distribution resolves events that are above the extreme threshold, and it  
77 does not rely on the Gaussian assumption. It measures the performance of the ensemble at the tail of the  
78 verification distribution (ERA5).

79 While a huge ensemble has a large temperature range by design, an operational decision-maker can use  
80 the probabilities associated with these temperatures to inform their decisions. In particular, they can use  
81 the huge ensemble if they are particularly concerned about low-likelihood events or to reduce the sampling  
82 uncertainty associated with extreme events. In the paragraph above, we discuss HENS's performance at the  
83 tail of the verification distribution (ERA5). In addition to this, HENS directly samples the tail of the forecast  
84 distribution with higher fidelity (e.g. Figure 9). This allows HENS to sample events that are low-likelihood  
85 in the forecast. These low-likelihood events do occur: 3% of events in summer 2023 were low-likelihood  
86 enough that they were completely out of the bounds of the IFS 10-day forecast (Figure 11b). HENS can  
87 sample these events (Figure 11a) without a degradation in CRPS or reliability. This means that HENS  
88 offers a way to directly simulate events that are out of the bounds of IFS. For these events, it provides a  
89 better estimate of low-likelihood events that exist at the tail of the forecast distribution. By simulating these  
90 events, HENS also offers a dataset with a large sample size to study the dynamics of these low-likelihood  
91 events (at the tail of the forecast distribution) post-hoc.

92 We also emphasize that HENS can be used beyond the context of operational meteorological decision-  
93 making. It can be used to study the drivers and statistics of extreme events in a retrospective hindcast  
94 mode. For this purpose, HENS offers many promising improvements over smaller ensembles, including a  
95 reduced likelihood of missed events (Figure 11 and 12), a better ability to have ensemble members represent  
96 the true value (Figure 6), and better information gain to sample low-likelihood events that occur at the  
97 tail of the ensemble distribution (Figure 1,3). These metrics ensure that a large ensemble provides more  
98 information than a small one, and they verify that the ensemble does not collapse where each member  
99 provides duplicative information. The trajectories that correctly capture the true outcome can be used to  
100 study the dynamics and drivers of extremes: a similar process has been used in [Mo et al. \[2022\]](#), [Millin  
101 and Furtado \[2022\]](#), [Leach et al. \[2024\]](#). It can be used to study counterfactuals, such as the probability  
102 of avoiding the 2023 Kansas City heatwave (Figure 5 HENS Part II). And it can be used to create a large  
103 dataset with many samples of events that exist at the tail of the IFS distribution, which would only have  
104 limited samples of the event or would be missed entirely.

105 But in this case, we would need to still show that the ensemble is actually representing the tails of the  
106 distribution correctly. This should be evaluated but it is a very hard problem, not only for the ensemble  
107 system, but also for the evaluation as you would need a very long test period to sample extreme events to  
108 understand the real quality of the ensemble when representing a 4-sigma event for, say, precipitation with  
109 enough statistics. This may not be possible without overlap between training and testing datasets.

110 We fully agree that there is limited observational data. This is a fundamental constraint. In the face  
111 of these limits, we note that we validate HENS against IFS on extreme diagnostics to the maximal extent  
112 possible on the time periods available. We hope that HENS, as well as future model improvements, lead to  
113 a model with comparable trustworthiness as physics-based models.

114 We validate HENS on the tails of the observational distribution. This validation is limited by the length  
115 of the observational dataset. But we also validate on HENS on its ability to sample the tails of the forecast  
116 distribution. For instance, HENS gives us a better estimate of the 99th percentile of all the ensemble mem-  
117 bers. This test of HENS does not require a large observational dataset, but rather requires comparing the  
118 large ensemble to the small ensemble.

119 HENS represents a first-of-its-kind experiment. If it yields promising results in understanding extreme  
120 statistics and drivers, perhaps it can be used as motivation for the weather and climate community to invest in  
121 huge ensembles of physics-based simulations. At the very least, if HENS were trained on purely simulated  
122 data, this would enable saving all the observed data for validation, and there could also be other perfect  
123 model experiments, in which HENS is validated against a large set of physics-based simulations.

124 If you represent all possible weather situations at day 10, this can well indicate that your model is all  
125 over the place when it is basically uncorrelated with the real-world trajectory.

126 Thank you for raising this point: this is a crucial aspect to validate. The HENS CRPS is similar to the  
127 58-member SFNO-BVMC CRPS at day 4, indicating that the huge ensemble is providing skillful forecasts  
128 at early lead times (Figure 8a). The same is also true for the HENS spread-error ratio (Figure C2). If the  
129 HENS forecasts were entirely unreliable, then we would expect these scores to be significantly degraded.  
130 We will also provide HENS ensemble mean RMSE scores and include calculation of statistics at earlier lead  
131 times, as discussed below.

132 It would be a much stronger statement if you see the same at day 2 or 5. It also smells a bit like cherry-  
133 picking when the evaluation is focusing on day 10+ as you see a good spread-error ratio here. I would like  
134 to see evaluations of earlier lead times (in particular for Figure 4, 6, 7).

135 Thank you very much for this feedback. We greatly appreciate this comment, as it will help strengthen our  
136 paper. We will perform this analysis at an earlier lead time. We note that while the spread-error ratio is at  
137 1 at day 10, it's reasonably close to 1 at earlier lead times (Figure C2). In our revised manuscript, will also  
138 include the HENS ensemble mean RMSE and spread as a function of lead time. For these two reasons, the  
139 results from Figure 10 and Figure 11 hold up at earlier lead times (see Figure D1 and Figure 11 itself.)

140 We emphasize that we are not cherry-picking a lead time of 10 days. We choose to validate this lead  
141 time because of our scientific interest in counterfactual trajectories. Forecasts at 10 day lead times are still  
142 correlated with the initial conditions, and they are still, on average, more skillful than climatology. At this  
143 lead time, we can look at a large trajectory of possible future weather states, accounting for synoptic-scale  
144 uncertainty. Still, at 10-days, we can rigorously validate that the results are realistic using medium-range  
145 weather diagnostics. For lead times longer than a few weeks, the chaotic limit of predictability requires other  
146 climatological diagnostics to be used, since the model is no longer conditioned on the initial conditions.  
147 Since ML emulators are new, we chose to focus on medium-range diagnostics for direct, rigorous validation  
148 that the ensemble output is trustworthy.

149 It would also be good if you could show results for more challenging quantities such as precipitation as  
150 well.

151 Thank you for raising this issue. Precipitation is excluded as a variable because of the challenges in obtaining  
152 a global training dataset with high-spatiotemporal resolution. Some ML model groups have a “lack of  
153 confidence in the quality of ERA5 precipitation data” [Price et al., 2024] and exclude the precipitation results  
154 from the main evaluation [Lam et al., 2023]. In addition to the training dataset challenge, the spatial statistics  
155 and long tails that are present in precipitation datasets, in some cases, indicate that further architectural  
156 changes are necessary for ML models [Pathak et al., 2022]. Precipitation is not included in the original  
157 SFNO [Bonev et al., 2023]. We note that the exclusion of precipitation is a common feature across many  
158 data-driven weather prediction models [Bi et al., 2023, Keisler, 2022, Chen et al., 2023a,b, Ramavajjala,  
159 2024, Cachay et al., 2024, Bodnar et al., 2024], many of which are leading models listed on WeatherBench.

160 The addition of precipitation is very much an important challenge at the forefront of data-driven weather  
161 prediction. In future research, we certainly wish to emulate precipitation to forecast LLHI precipitation  
162 events and will include it as a variable in our ensemble: however, for this work, we focus on the development  
163 of ensembles and study surface temperature events (with other variables forthcoming) to our analysis.

164 The first part that outlines how a huge ensemble can be run and what hardware is needed is very inter-  
165 esting. However, it would be good if you could put the results a bit better into perspective. The data pipeline  
166 that you describe seems to bring a machine of the size of Perlmutter to its limits. A 25 GB/s connection  
167 is rather expensive to maintain. This does not go down well with the claim the ML models are orders of  
168 magnitude cheaper when compared to conventional models?

169 Thank you for raising this interesting point of comparison and discussion. Regarding computational cost,  
170 we are not considering data transfer. Because ML models generate an ensemble member so quickly (one  
171 hour for IFS on 96 CPUs, one minute for SFNO on 1 GPU), it is more feasible to run them in huge ensemble  
172 configurations. The data transfer stresses are relevant largely because ML makes it reasonable to create 256  
173 ensemble members simultaneously. For instance, in the data pipeline we describe, it was possible for us to  
174 access 256 GPUs to generate 256 ensemble members per minute simultaneously (Section 2.1 of HENS Part  
175 II). It would be more challenging to request 24,576 CPUs (96 CPUs per ensemble member \* 256 members)  
176 at once to create 256 members at one time. Even then, each member would take one hour, not one minute,  
177 so the data transfer requirements would not be as high. We agree that these new capabilities require new,  
178 fast, and expensive data transfer connections. But now these costs also open new science questions around  
179 huge ensemble datasets that were impractical to explore with traditional models.

180 Would it be possible to compare the huge ensemble also against other ML ensemble systems that are  
181 published in the literature?

182 In future work, we agree it would be interesting to compare huge ensembles from multiple ML architectures.  
183 However, the core of this study is to assess the effect of ensemble size. The central analysis necessary to  
184 perform this goal is to benchmark our huge ensemble against smaller ensembles (58 members) from the  
185 same model, and against IFS. Assessing the performance against other ML ensembles is out of the scope of  
186 this study, especially since we do not have access to another huge ML ensemble.

187 Minor comments: P6: How large is the model if you want to send it around instead of the data?

188 The SFNO checkpoint model weights are 8.4 GB per checkpoint.

189 How does climate change enter the discussion around huge ensembles?

190 We choose to run our huge ensemble in summer 2023, the hottest summer on record [Esper et al., 2024].  
191 This allows us to study alternate trajectories that could have occurred due to internal variability in one of the  
192 warmest summers on record. However, we do not explicitly model the influence of CO2 in our forecasts, as  
193 other emulators have recently added this capability [Watt-Meyer et al., 2024].

194 Figure 11 seems to have an error in the caption with 240, 246, 252... not fitting to day 4,7,10.

195 We have fixed this error, thank you very much.

196 **Comments from Reviewer #2**

197 In Part 1, the integrated system was validated, while in Part 2, the focus shifted to simulating extreme weather  
198 events, particularly those exceeding 4 standard deviations from the mean. The creation and analysis of 7,424  
199 ensemble members using a range of probabilistic metrics is impressive and represents a significant advance-  
200 ment in ensemble-based forecasting. This large ensemble approach has substantial potential for improving  
201 the prediction and assessment of extreme weather events, offering valuable insights into their likelihood and  
202 associated uncertainties. Moreover, the integration of artificial intelligence, specifically through Spherical  
203 Fourier Neural Operators, presents a promising new direction for weather forecasting, combining compu-  
204 tational efficiency with robust performance. However, several concerns need to be addressed, as outlined  
205 in the detailed comments below. With these revisions, we believe the manuscript will be well-prepared for  
206 publication.

207 Thank you for your review of our paper.

208 Major Comments 1. The authors do not demonstrate whether the error accumulates and spreads as the  
209 lead time progresses, and the explanation for this omission is unclear. Since the perturbations are based on  
210 bred vectors, the lack of error accumulation could potentially result from deviations introduced by the initial  
211 bred vector itself. Therefore, including an analysis of the variance and characteristics of the bred vector  
212 would enhance the validity of the results and provide a more convincing argument.

213 Thank you for this comment: we will clarify this in our upcoming manuscript. In Figure C2 of our  
214 manuscript, we show that the spread-error ratio is approximately 1 for HENS (the 7,424 huge ensemble)  
215 and for a 58-member ensemble. This is an important benchmark metric that indicates that the ensemble  
216 spread and the ensemble mean RMSE are comparable. We show the ensemble mean RMSE in part I of  
217 our manuscript (Figure 9) for the 58-member ensemble; it grows as a function of lead time. In our revised  
218 manuscript, we will show that the ensemble mean RMSE and variance (with the reasonable spread-error  
219 ratio in Figure C2) for HENS also grows with lead time.

220 2. The authors have only analyzed temperature, but with the availability of u10m data, further analysis of  
221 wind gusts could be conducted. Limiting the results to temperature alone restricts the reliability of the study.  
222 Additional analyses of other extreme events using different variables would strengthen the manuscript. If it  
223 is feasible to modify the deep learning model to simulate precipitation, I would recommend including it. If  
224 not, at the very least, wind gust analysis should be explored and discussed.

225 Thank you for raising this suggestion. We will include an analysis of wind in our results in our revised  
226 manuscript. It is not possible to modify the deep learning model to simulate precipitation (see the manuscript  
227 comments for Part I), as that is not one of the variables in the backbone of SFNO and many other data-driven  
228 weather prediction models.

229 3. The study focuses exclusively on heat waves from June to August. However, cold waves represent the  
230 opposite end of temperature extremes and are equally important. If the authors can demonstrate that their  
231 system is capable of reproducing cold waves, it would significantly enhance the reliability of the model in  
232 predicting a broader range of temperature extremes.

233 Thank you for raising this possibility. We evaluated the cold tail of the ensemble distribution in the calcu-  
234 lation of ensemble gain (Eqn F2, Figure 1-3), the large sample behavior of the 0.1st and 10th percentiles

235 (Figure 4), and in the calculation of the outlier statistic (Figure 11). We believe that this analysis of the  
236 cold tails is sufficient for our core scientific questions, and we respectfully suggest that further evaluation of  
237 cold waves would not further the core of this manuscript on huge ensembles. We do not intend to further  
238 evaluate cold waves in our huge ensemble simulation, as we only have one season of data (June-July-August  
239 2023). This would not be enough data to evaluate cold waves in midlatitude land. We intentionally selected  
240 this season to study for very specific reasons because it was one of the warmest seasons on record [Esper  
241 et al., 2024], and we believe that further analysis of cold waves could happen in future work, particularly  
242 simulations of other seasons.

243 Minor Comments 1. Perturbations were applied using both bred vectors and checkpoints. One question  
244 that arises is which of these two methods is more sensitive to an increased perturbation. A brief analysis  
245 and discussion on this point would be valuable for readers to better understand the relative impact of each  
246 approach.

247 We compare the relative influence of multi-checkpointing and bred vectors in our Part I manuscript, Figure  
248 6. We discuss this behavior in Part I as it is a fundamental question about our ensemble setup, rather  
249 than something intrinsic in the HENS run in summer 2023, which is the main topic of Part II. Our current  
250 discussion on the topic is as follows:

251 *As a model perturbation, multi-checkpointing does not represent the uncertainty arising from an imperfect*  
252 *initial condition. Therefore, the multi-checkpoint ensemble is underdispersive at early lead times. On the*  
253 *other hand, the ensemble composed only of bred vectors is underdispersive on synoptic time scales (3-5*  
254 *days) when representing model uncertainty also becomes important for obtaining good calibration.*

255 Furthermore, we show that multi-checkpointing (beyond the 29 checkpoints we use) is not sensitive to  
256 increased perturbation. Increasing the multi-checkpointing perturbation would mean creating an ensemble  
257 with more than 29 checkpoints. As a function of the number of checkpoints, we show that the ensemble  
258 spread has converged (for t2m in the current manuscript, and with other variables in the next version) by 29  
259 checkpoints (Figure 3, HENS Part I).

260 2. There are typos in plural and singular, please find and correct them.

261 Thank you. We will do so.

## 262 References

263 K. Bi, L. Xie, H. Zhang, X. Chen, X. Gu, and Q. Tian. Accurate medium-range global weather forecasting  
264 with 3D neural networks. *Nature*, 619(7970):533–538, July 2023. ISSN 1476-4687. doi:[10.1038/s41586-  
265 023-06185-3](https://doi.org/10.1038/s41586-023-06185-3). URL <http://dx.doi.org/10.1038/s41586-023-06185-3>. 4

266 C. Bodnar, W. P. Bruinsma, A. Lucic, M. Stanley, A. Vaughan, J. Brandstetter, P. Garvan, M. Riechert, J. A.  
267 Weyn, H. Dong, J. K. Gupta, K. Thambiratnam, A. T. Archibald, C.-C. Wu, E. Heider, M. Welling, R. E.  
268 Turner, and P. Perdikaris. A foundation model for the earth system, 2024. URL [https://arxiv.  
269 org/abs/2405.13063](https://arxiv.org/abs/2405.13063). 4

270 B. Bonev, T. Kurth, C. Hundt, J. Pathak, M. Baust, K. Kashinath, and A. Anandkumar. Spherical Fourier  
271 Neural Operators: Learning stable dynamics on the sphere. In *International conference on machine  
272 learning*, pages 2806–2823. PMLR, 2023. 4

- 273 S. R. Cachay, B. Henn, O. Watt-Meyer, C. S. Bretherton, and R. Yu. Probabilistic Emulation of a Global  
274 Climate Model with Spherical Diffusion. *arXiv preprint arXiv:2406.14798*, 2024. 4
- 275 K. Chen, T. Han, J. Gong, L. Bai, F. Ling, J.-J. Luo, X. Chen, L. Ma, T. Zhang, R. Su, et al. Fengwu: Pushing  
276 the skillful global medium-range weather forecast beyond 10 days lead. *arXiv preprint arXiv:2304.02948*,  
277 2023a. 4
- 278 L. Chen, X. Zhong, F. Zhang, Y. Cheng, Y. Xu, Y. Qi, and H. Li. FuXi: A cascade machine learning forecast-  
279 ing system for 15-day global weather forecast. *npj Climate and Atmospheric Science*, 6(1):190, 2023b.  
280 doi:10.1038/s41612-023-00512-1. URL <https://doi.org/10.1038/s41612-023-00512-1>.  
281 4
- 282 J. Esper, M. Torbenson, and U. Büntgen. 2023 summer warmth unparalleled over the past 2, 000 years.  
283 *Nature*, 631(8019):94–97, May 2024. ISSN 1476-4687. doi:10.1038/s41586-024-07512-y. URL <http://dx.doi.org/10.1038/s41586-024-07512-y>. 5, 7
- 285 R. Keisler. Forecasting global weather with graph neural networks. *arXiv preprint arXiv:2202.07575*, 2022.  
286 4
- 287 R. Lam, A. Sanchez-Gonzalez, M. Willson, P. Wirnsberger, M. Fortunato, F. Alet, S. Ravuri, T. Ewalds,  
288 Z. Eaton-Rosen, W. Hu, et al. Learning skillful medium-range global weather forecasting. *Science*, 382  
289 (6677):1416–1421, 2023. doi:10.1126/science.adi2336. URL <https://www.science.org/doi/abs/10.1126/science.adi2336>. 4
- 291 N. J. Leach, C. D. Roberts, M. Aengenheyster, D. Heathcote, D. M. Mitchell, V. Thompson, T. Palmer,  
292 A. Weisheimer, and M. R. Allen. Heatwave attribution based on reliable operational weather forecasts.  
293 *Nature Communications*, 15(1), May 2024. ISSN 2041-1723. doi:10.1038/s41467-024-48280-7. URL  
294 <http://dx.doi.org/10.1038/s41467-024-48280-7>. 3
- 295 A. Mahesh, W. Collins, B. Bonev, N. Brenowitz, Y. Cohen, J. Elms, P. Harrington, K. Kashinath, T. Kurth,  
296 J. North, et al. Huge Ensembles Part I: Design of Ensemble Weather Forecasts using Spherical Fourier  
297 Neural Operators. *arXiv preprint arXiv:2408.03100*, 2024a. 1
- 298 A. Mahesh, W. Collins, B. Bonev, N. Brenowitz, Y. Cohen, P. Harrington, K. Kashinath, T. Kurth, J. North,  
299 T. O’Brien, et al. Huge Ensembles Part II: Properties of a Huge Ensemble of Hindcasts Generated with  
300 Spherical Fourier Neural Operators. *arXiv preprint arXiv:2408.01581*, 2024b. 1
- 301 O. T. Millin and J. C. Furtado. The Role of Wave Breaking in the Development and Subseasonal Fore-  
302 casts of the February 2021 Great Plains Cold Air Outbreak. *Geophysical Research Letters*, 49(21),  
303 Oct. 2022. ISSN 1944-8007. doi:10.1029/2022gl100835. URL <http://dx.doi.org/10.1029/2022GL100835>. 3
- 305 R. Mo, H. Lin, and F. Vitart. An anomalous warm-season trans-Pacific atmospheric river linked to  
306 the 2021 western North America heatwave. *Communications Earth and Environment*, 3(1), June  
307 2022. ISSN 2662-4435. doi:10.1038/s43247-022-00459-w. URL <http://dx.doi.org/10.1038/s43247-022-00459-w>. 3
- 309 J. Pathak, S. Subramanian, P. Harrington, S. Raja, A. Chattopadhyay, M. Mardani, T. Kurth, D. Hall, Z. Li,  
310 K. Azizzadenesheli, et al. FourCastNet: A global data-driven high-resolution weather model using adap-  
311 tive Fourier neural operators. *arXiv preprint arXiv:2202.11214*, 2022. 4



- 312 I. Price, A. Sanchez-Gonzalez, F. Alet, T. R. Andersson, A. El-Kadi, D. Masters, T. Ewalds, J. Stott, S. Mo-  
313 hamed, P. Battaglia, R. Lam, and M. Willson. Probabilistic weather forecasting with machine learn-  
314 ing. *Nature*, 637(8044):84–90, Dec. 2024. ISSN 1476-4687. doi:10.1038/s41586-024-08252-9. URL  
315 <http://dx.doi.org/10.1038/s41586-024-08252-9>. 4
- 316 V. Ramavajjala. HEAL-ViT: Vision Transformers on a spherical mesh for medium-range weather forecast-  
317 ing. *arXiv preprint arXiv:2403.17016*, 2024. 4
- 318 O. Watt-Meyer, B. Henn, J. McGibbon, S. K. Clark, A. Kwa, W. A. Perkins, E. Wu, L. Harris, and C. S.  
319 Bretherton. Ace2: Accurately learning subseasonal to decadal atmospheric variability and forced re-  
320 sponses, 2024. URL <https://arxiv.org/abs/2411.11268>. 5
